# Supplementary material for: A High-Level Language for Rule-Based Modelling
Source: PubMed Central journal article supplement (PMC4456403; doi:10.1371/journal.pone.0114296), 2015-06-04
Supplement: pone.0114296.s002.pdf [file pone.0114296.s002.pdf]

Listing S2: A flat Kappa MAPK cascade model adapted from [1]. Reproduced with permission from the author but with some sites renamed and the rules reorganised to better reflect the underlying modular structure.

```

1 Ras(n~gtp),Raf(n~u) → Ras(n~gtp!1),Raf(n~u!1)
2 Ras(n~gtp!1),Raf(n~u!1) → Ras(n~gtp!1),Raf(n~p!1)
3 Ras(n~gtp!1),Raf(n!1) → Ras(n~gtp),Raf(n)
4 PP2A1(n),Raf(n~p) → PP2A1(n!1),Raf(n~p!1)
5 PP2A1(n!1),Raf(n~p!1) → PP2A1(n!1),Raf(n~u!1)
6 PP2A1(n!1),Raf(n!1) → PP2A1(n),Raf(n)
7
8 Raf(n~p),MEK(S222~u) → Raf(n~p!1),MEK(S222~u!1)
9 Raf(n~p!1),MEK(S222~u!1) → Raf(n~p!1),MEK(S222~p!1)
10 Raf(n~p!1),MEK(S222!1) → Raf(n~p),MEK(S222)
11 PP2A2(n),MEK(S222~p) → PP2A2(n!1),MEK(S222~p!1)
12 PP2A2(n!1),MEK(S222~p!1) → PP2A2(n!1),MEK(S222~u!1)
13 PP2A2(n!1),MEK(S222!1) → PP2A2(n),MEK(S222)
14
15 Raf(n~p),MEK(S218~u) → Raf(n~p!1),MEK(S218~u!1)
16 Raf(n~p!1),MEK(S218~u!1) → Raf(n~p!1),MEK(S218~p!1)
17 Raf(n~p!1),MEK(S218!1) → Raf(n~p),MEK(S218)
18 PP2A2(n),MEK(S218~p) → PP2A2(n!1),MEK(S218~p!1)
19 PP2A2(n!1),MEK(S218~p!1) → PP2A2(n!1),MEK(S218~u!1)
20 PP2A2(n!1),MEK(S218!1) → PP2A2(n),MEK(S218)
21
22 MEK(n,S218~p,S222~p),ERK(T185~u) → MEK(n!1,S218~p,S222~p),ERK(T185~u!1)
23 MEK(n!1,S218~p,S222~p),ERK(T185~u!1) → MEK(n!1,S218~p,S222~p),ERK(T185~p!1)
24 MEK(n!1,S218~p,S222~p),ERK(T185!1) → MEK(n,S218~p,S222~p),ERK(T185)
25 MKP3(n),ERK(T185~p) → MKP3(n!1),ERK(T185~p!1)
26 MKP3(n!1),ERK(T185~p!1) → MKP3(n!1),ERK(T185~u!1)
27 MKP3(n!1),ERK(T185!1) → MKP3(n),ERK(T185)
28
29 MEK(n,S218~p,S222~p),ERK(Y187~u) → MEK(n!1,S218~p,S222~p),ERK(Y187~u!1)
30 MEK(n!1,S218~p,S222~p),ERK(Y187~u!1) → MEK(n!1,S218~p,S222~p),ERK(Y187~p!1)
31 MEK(n!1,S218~p,S222~p),ERK(Y187!1) → MEK(n,S218~p,S222~p),ERK(Y187)
32 MKP3(n),ERK(Y187~p) → MKP3(n!1),ERK(Y187~p!1)
33 MKP3(n!1),ERK(Y187~p!1) → MKP3(n!1),ERK(Y187~u!1)
34 MKP3(n!1),ERK(Y187!1) → MKP3(n),ERK(Y187)

```

## References

[1] Vincent Danos. Agile modelling of cellular signalling. *Electr. Notes Theor. Comput. Sci.*, 229(4):3–10, 2009.
