# Supplementary material for: A High-Level Language for Rule-Based Modelling
Source: PubMed Central journal article supplement (PMC4456403; doi:10.1371/journal.pone.0114296), 2015-06-04
Supplement: pone.0114296.s003.pdf [file pone.0114296.s003.pdf]

Listing S3: A flat Kappa model of insulin signalling by Isha Antani and Gordon Webster. The model is reproduced with permission from the second author, but with rule labels and comments removed.

```

1 IGF1R(Y1131~u, alpha) → IGF1R(Y1131~p, alpha)
2 PI3K-canon(subs!1), PIP-canon(three!1) →
3   PI3K-canon(subs), PIP-canon(three)
4 GEF(gef!1), Rab10(g!1) → GEF(gef), Rab10(g)
5 PTP1B(receptor!1), IGF1R(Y1131~p, Y1136~p, Y1135~p, NPXY~p, ptp!1) →
6   PTP1B(receptor!1), IGF1R(Y1131~u, Y1136~u, Y1135~u, NPXY~u, ptp!1)
7 PDK1(PH), PIP-canon(three~p) → PDK1(PH!1), PIP-canon(three~p!1)
8 Akt-canon(foxo4!1), FoxO4(T28~u, akt!1) →
9   Akt-canon(foxo4!1), FoxO4(T28~p, akt!1)
10 Akt-canon(foxo4!1), FoxO4(S193~u, akt!1) →
11   Akt-canon(foxo4!1), FoxO4(S193~p, akt!1)
12 IGF1R(alpha, NPXY~u) → IGF1R(alpha, NPXY~p)
13 GSK3b(S9~u, a), Akt-canon(T308~p, subs, S473~p) →
14   GSK3b(S9~u, a!1), Akt-canon(T308~p, subs!1, S473~p)
15 FoxO4(S193~p, T28~p, p1433), P1433(dum~off, foxo4) →
16   FoxO4(S193~p, T28~p, p1433!1), P1433(dum~on, foxo4!1)
17 mTOR(sin), SIN1(m) → mTOR(sin!1), SIN1(m!1)
18 PTP1B(receptor), IGF1R(Y1131~p, Y1136~p, Y1135~p, NPXY~p, ptp) →
19   PTP1B(receptor!1), IGF1R(Y1131~p, Y1136~p, Y1135~p, NPXY~p, ptp!1)
20 FoxO4(p1433!1), P1433(dum~on, foxo4!1) → FoxO4(p1433), P1433(dum~off, foxo4)
21 PDK1(PH!1), PIP-canon(three!1) → PDK1(PH), PIP-canon(three)
22 mTOR(sin!1, fkb12, heat), Rictor(sin!2, m2, m1), SIN1(ric!2, m!1) →
23   mTOR(sin!3, fkb12!2, heat!1), Rictor(sin!4, m2!3, m1!1), SIN1(ric!4, m!3)
24 Akt-canon(T308~p, subs, S473~p), GSK3a(S21~u, a) →
25   Akt-canon(T308~p, subs!1, S473~p), GSK3a(S21~u, a!1)
26 Akt-canon(foxo3a!1), FoxO3A(T32~u, akt!1) →
27   Akt-canon(foxo3a!1), FoxO3A(T32~p, akt!1)
28 IR-canon(alpha), Insulin-canon(ir) →
29   IR-canon(alpha!1), Insulin-canon(ir!1)
30 FKB12(m, rap!1), rapamycin(fkb12!1), mTOR(fkb12!1, heat, sin) →
31   FKB12(m!2, rap!1), rapamycin(fkb12!1), mTOR(fkb12!2, heat, sin)
32 Akt-canon(foxo3a!1), FoxO3A(S253~u, akt!1) →
33   Akt-canon(foxo3a!1), FoxO3A(S253~p, akt!1)
34 IR-canon(alpha!1), Insulin-canon(ir!1) →
35   IR-canon(alpha), Insulin-canon(ir)
36 mTOR(!1), mLST8(m!1) → mTOR(!), mLST8(m)
37 mTOR(sin!1), SIN1(m!1) → mTOR(sin), SIN1(m)
38 IR-canon(NPXY~p!1), IRS2(PTB!1, Y~u) → IR-canon(NPXY~p!1), IRS2(PTB!1, Y~p)
39 IGF1(igf1r), IGF1R(alpha) → IGF1(igf1r!1), IGF1R(alpha!1)
40 IGF1R(NPXY~p!1), IRS2(PTB!1, Y~u) → IGF1R(NPXY~p!1), IRS2(PTB!1, Y~p)
41 PTP1B(receptor!1), IGF1R(ptp!1) → PTP1B(receptor), IGF1R(ptp)
42 IRS2(Y~p, pi3k), PI3K-canon(p110~u, SH2-p85) →
43   IRS2(Y~p, pi3k!1), PI3K-canon(p110~u, SH2-p85!1)
44 FoxO3A(S253~p, T32~p, p1433), P1433(dum~off, foxo3a) →
45   FoxO3A(S253~p, T32~p, p1433!1), P1433(dum~on, foxo3a!1)
46 IGF1(igf1r!1), IGF1R(alpha!1) → IGF1(igf1r), IGF1R(alpha)
47 IR-canon(NPXY~p), IRS2(PTB, Y~u) → IR-canon(NPXY~p!1), IRS2(PTB!1, Y~u)
48 FoxO3A(p1433!1), P1433(dum~on, foxo3a!1) →
49   FoxO3A(p1433), P1433(dum~off, foxo3a)
50 PKCz-canon(glut!1), Glut4-canon(pkc~off!1) →
51   PKCz-canon(glut!1), Glut4-canon(pkc~on!1)
52 FoxO4(S193~u, T28~u, akt), Akt-canon(T308~p, foxo4, S473~p) →
53   FoxO4(S193~u, T28~u, akt!1), Akt-canon(T308~p, foxo4!1, S473~p)
54 Akt-canon(foxo1!1), FoxO1(S256~p, T24~u, akt!1) →
55   Akt-canon(foxo1!1), FoxO1(S256~p, T24~p, akt!1)
56 mTOR(heat!1, fkb12!2), Rictor(m2!2, m1!1) → mTOR(heat, fkb12), Rictor(m2, m1)
57 Glut4-canon(loc~gsv, akt~on, pkc~on) → Glut4-canon(loc~pm, akt~on, pkc~off)
58 IGF1R(NPXY~p), IRS2(PTB, Y~u) → IGF1R(NPXY~p!1), IRS2(PTB!1, Y~u)
59 Akt-canon(foxo1!1), FoxO1(S256~p, S319~u, akt!1) →
60   Akt-canon(foxo1!1), FoxO1(S256~p, S319~p, akt!1)
61 Glut4-canon(rab!1, akt~off), Rab10(g~gtp!1) →
62   Glut4-canon(rab!1, akt~on), Rab10(g~gtp!1)
63 FoxO3A(S253~u, T32~u, akt), Akt-canon(T308~p, foxo3a, S473~p) →
64   FoxO3A(S253~u, T32~u, akt!1), Akt-canon(T308~p, foxo3a!1, S473~p)
65 PI3K-canon(SH2-p85!1), IRS2(pi3k!1) → PI3K-canon(SH2-p85), IRS2(pi3k)
66 GSK3a(S21~u, glysyn, a), GS(ST~p, STXXXST~u) →
67   GSK3a(S21~u, glysyn!1, a), GS(ST~p, STXXXST~u!1)
68 GS(STXXXST!1), PP1(glysyn!1) → GS(STXXXST), PP1(glysyn)

```

69 SIN1(m!4,ric!3,akt!5), Akt-canon(S473~u!5), Rictor(sin!3,m2!2,m!1),  
70 mLST8(m!6), mTOR(sin!4,heat!1,l!6,fbk12!2) →  
71 SIN1(m!4,ric!3,akt!5), Akt-canon(S473~p!5),  
72 Rictor(sin!3,m2!2,m!1), mLST8(m!6), mTOR(sin!4,heat!1,l!6,fbk12!2)  
73 IR-canon(NPXY!1), IRS1-canon(PTB!1) → IR-canon(NPXY), IRS1-canon(PTB)  
74 Akt-canon(foxo4!1), FoxO4(akt!1) → Akt-canon(foxo4), FoxO4(akt)  
75 GSK3a(S21~p,glysyn!1,a!2), Akt-canon(subs!2), GS(STXXXST~p!1) →  
76 GSK3a(S21~p,glysyn,a!1), Akt-canon(subs!1), GS(STXXXST~p)  
77 SIN1(akt), Akt-canon(S473~u,T308~p) → SIN1(akt!1), Akt-canon(S473~u!1,T308~p)  
78 IGF1R(NPXY!1), IRS1-canon(PTB!1) → IGF1R(NPXY), IRS1-canon(PTB)  
79 CK2(glysyn!1), GS(ST~u!1) → CK2(glysyn!1), GS(ST~p!1)  
80 Akt-canon(T308~p), PP2A(B55-a) → Akt-canon(T308~p!1), PP2A(B55-a!1)  
81 IR-canon(NPXY~p,ptp!1,Y~p), PTP1B(receptor!1) →  
82 IR-canon(NPXY~u,ptp!1,Y~u), PTP1B(receptor!1)  
83 Akt-canon(foxo3a!1), FoxO3A(akt!1) → Akt-canon(foxo3a), FoxO3A(akt)  
84 Akt-canon(foxo1!1), FoxO1(akt!1) → Akt-canon(foxo1), FoxO1(akt)  
85 Akt-canon(PH), PIP-canon(three~p) → Akt-canon(PH!1), PIP-canon(three~p!1)  
86 GS(STXXXST~p!1), PP1(glysyn!1,ins~p) → GS(STXXXST~u!1), PP1(glysyn!1,ins~p)  
87 PKCz-canon(pdk1!1,T410~u), PDK1(pkc!1) →  
88 PKCz-canon(pdk1!1,T410~p), PDK1(pkc!1)  
89 AS160(gap!1), Akt-canon(as160!1) → AS160(gap), Akt-canon(as160)  
90 PHLPP(PDZ), Akt-canon(S473~p) → PHLPP(PDZ!1), Akt-canon(S473~p!1)  
91 GSK3b(glysyn!1), GS(STXXXST~u!1) → GSK3b(glysyn!1), GS(STXXXST~p!1)  
92 PKCz-canon(pdk1,T410~u), PDK1(pkc,PH) →  
93 PKCz-canon(pdk1!1,T410~u), PDK1(pkc!1,PH)  
94 AS160(gap~u!1), Akt-canon(as160!1) → AS160(gap~p!1), Akt-canon(as160!1)  
95 IR-canon(alpha,Y~u) → IR-canon(alpha,Y~p)  
96 GSK3a(glysyn!1), GS(STXXXST~u!1) → GSK3a(glysyn!1), GS(STXXXST~p!1)  
97 IR-canon(alpha,NPXY~u) → IR-canon(alpha,NPXY~p)  
98 PKCz-canon(pdk1!1), PDK1(pkc!1) → PKCz-canon(pdk1), PDK1(pkc)  
99 AS160(gap~u), Rab10(g~gtp) → AS160(gap~u!1), Rab10(g~gtp!1)  
100 IR-canon(NPXY~p,ptp,Y~p), PTP1B(receptor) →  
101 IR-canon(NPXY~p,ptp!1,Y~p), PTP1B(receptor!1)  
102 PIP-canon(three~p!1), PTEN(subs!1) → PIP-canon(three~u!1), PTEN(subs!1)  
103 AS160(gap!1), Rab10(g!1) → AS160(gap), Rab10(g)  
104 IR-canon(ptp!1), PTP1B(receptor!1) → IR-canon(ptp), PTP1B(receptor)  
105 PI3K-canon(p110~p,subs!1,SH2-p85), PIP-canon(three~u!1) →  
106 PI3K-canon(p110~p,subs!1,SH2-p85), PIP-canon(three~p!1)  
107 IGF1R(Y1136~u,alpha) → IGF1R(Y1136~p,alpha)  
108 IRS2(pi3k!1), PI3K-canon(p110~u,SH2-p85!1) →  
109 IRS2(pi3k!1), PI3K-canon(p110~p,SH2-p85!1)  
110 CK2(glysyn), GS(ST~u) → CK2(glysyn!1), GS(ST~u!1)  
111 IRS1-canon(pi3k!1), PI3K-canon(p110~u,SH2-p85!1) →  
112 IRS1-canon(pi3k!1), PI3K-canon(p110~p,SH2-p85!1)  
113 CK2(glysyn!1), GS(ST!1) → CK2(glysyn), GS(ST)  
114 IGF1R(Y1135~u,alpha) → IGF1R(Y1135~p,alpha)  
115 Akt-canon(PH!1,T308~u), PDK1(PH!2,akt),  
116 PIP-canon(three~p!2), PIP-canon(three~p!1) →  
117 Akt-canon(PH!1,T308~u!2), PDK1(PH!3,akt!2),  
118 PIP-canon(three~p!3), PIP-canon(three~p!1)  
119 PI3K-canon(p110~p,subs,SH2-p85), PIP-canon(three~u) →  
120 PI3K-canon(p110~p,subs!1,SH2-p85), PIP-canon(three~u!1)  
121 GEF(gef), Rab10(g~gdp) → GEF(gef!1), Rab10(g~gdp!1)  
122 mTOR(l), mLST8(m) → mTOR(!1), mLST8(m!1)  
123 Rab10(g~gtp), Glut4-canon(loc~gsv,rab,akt~off) →  
124 Rab10(g~gtp!1), Glut4-canon(loc~gsv,rab!1,akt~off)  
125 FoxO1(S256~u,S319~u,T24~u,akt), Akt-canon(T308~p,foxo1,S473~p) →  
126 FoxO1(S256~u,S319~u,T24~u,akt!1), Akt-canon(T308~p,foxo1!1,S473~p)  
127 IR-canon(NPXY!1), IRS2(PTB!1) → IR-canon(NPXY), IRS2(PTB)  
128 Akt-canon(foxo1!1), FoxO1(S256~u,akt!1) →  
129 Akt-canon(foxo1!1), FoxO1(S256~p,akt!1)  
130 Glut4-canon(loc~gsv,pc~off), PKCz-canon(glut,T410~p) →  
131 Glut4-canon(loc~gsv,pc~off!1), PKCz-canon(glut!1,T410~p)  
132 FKB12(m!2), mTOR(fbk12!2) → FKB12(m), mTOR(fbk12)  
133 AS160(gap~u!1), Rab10(g~gdp!1), Akt-canon(as160,S473~p,T308~p) →  
134 AS160(gap~u!1), Rab10(g~gdp), Akt-canon(as160!1,S473~p,T308~u)  
135 FoxO1(S256~p,S319~p,T24~p,p1433), P1433(dum~off,foxo1) →  
136 FoxO1(S256~u,S319~u,T24~u,p1433!1), P1433(dum~on,foxo1!1)  
137 Glut4-canon(rab!1), Rab10(g~gtp!1) → Glut4-canon(rab), Rab10(g~gtp)  
138 SIN1(akt!1), Akt-canon(S473!1) → SIN1(akt), Akt-canon(S473)  
139 FoxO1(p1433!1), P1433(dum~on,foxo1!1) → FoxO1(p1433), P1433(dum~off,foxo1)

140 PKCz-canon(glut!1), Glut4-canon(pkc!1) → PKCz-canon(glut), Glut4-canon(pkc)  
141 SIN1(ric), Rictor(sin) → SIN1(ric!4), Rictor(sin!4)  
142 Akt-canon(T308!1), PP2A(B55-a!1) → Akt-canon(T308), PP2A(B55-a)  
143 rapamycin(fkb12), FKB12(rap) → rapamycin(fkb12!1), FKB12(rap!1)  
144 IGF1R(NPXY!1), IRS2(PTB!1) → IGF1R(NPXY), IRS2(PTB)  
145 SIN1(ric!1), Rictor(sin!1) → SIN1(ric), Rictor(sin)  
146 Akt-canon(PH!1), PIP-canon(three!1) → Akt-canon(PH), PIP-canon(three)  
147 FKB12(rap!1), rapamycin(fkb12!1) → FKB12(rap), rapamycin(fkb12)  
148 IR-canon(NPXY~p!1), IRS1-canon(PTB!1,Y~u) →  
149 IR-canon(NPXY~p!1), IRS1-canon(PTB!1,Y~p)  
150 GEF(gef!1), Rab10(g~gdp!1) → GEF(gef!1), Rab10(g~gtp!1)  
151 PHLPP(PDZ!1), Akt-canon(S473!1) → PHLPP(PDZ), Akt-canon(S473)  
152 Akt-canon(T308~p!1), PP2A(B55-a!1) → Akt-canon(T308~u!1), PP2A(B55-a!1)  
153 IGF1R(NPXY~p!1), IRS1-canon(PTB!1,Y~u) →  
154 IGF1R(NPXY~p!1), IRS1-canon(PTB!1,Y~p)  
155 AS160(gap~u!1), Rab10(g~gtp!1) → AS160(gap~u!1), Rab10(g~gdp!1)  
156 Akt-canon(T308!1), PDK1(akt!1) → Akt-canon(T308), PDK1(akt)  
157 IRS1-canon(Y~p,pi3k), PI3K-canon(p110~u,SH2-p85) →  
158 IRS1-canon(Y~p,pi3k!1), PI3K-canon(p110~u,SH2-p85!1)  
159 PIP-canon(three~p), PTEN(subs) → PIP-canon(three~p!1), PTEN(subs!1)  
160 GSK3b(glysyn!1,a!2,S9~u), Akt-canon(subs!2), GS(STXXXST!1) →  
161 GSK3b(glysyn!1,a!2,S9~p), Akt-canon(subs!2), GS(STXXXST!1)  
162 Akt-canon(subs!1), GSK3b(a!1) → Akt-canon(subs), GSK3b(a) @ 1.0  
163 GSK3b(S9~u,glysyn,a), GS(ST~p,STXXXST~u) →  
164 GSK3b(S9~u,glysyn!1,a), GS(ST~p,STXXXST~u!1)  
165 IR-canon(NPXY~p), IRS1-canon(PTB,Y~u) →  
166 IR-canon(NPXY~p!1), IRS1-canon(PTB!1,Y~u)  
167 PIP-canon(three!1), PTEN(subs!1) → PIP-canon(three), PTEN(subs)  
168 GSK3b(glysyn!1,a!2,S9~p), Akt-canon(subs!2), GS(STXXXST~p!1) →  
169 GSK3b(glysyn,a!1,S9~p), Akt-canon(subs!1), GS(STXXXST~p)  
170 IGF1R(NPXY~p), IRS1-canon(PTB,Y~u) → IGF1R(NPXY~p!1), IRS1-canon(PTB!1,Y~u)  
171 Akt-canon(PH!1,T308~u!2), PDK1(PH!3,akt!2),  
172 PIP-canon(three~p!1), PIP-canon(three~p!3) →  
173 Akt-canon(PH!1,T308~p!2), PDK1(PH!3,akt!2),  
174 PIP-canon(three~p!1), PIP-canon(three~p!3)  
175 Akt-canon(T308~p,S473~p), PP1(ins~u) → Akt-canon(T308~p,S473~p), PP1(ins~p)  
176 Akt-canon(subs!1), GSK3a(a!1) → Akt-canon(subs), GSK3a(a)  
177 IRS1-canon(pi3k!1), PI3K-canon(SH2-p85!1) →  
178 IRS1-canon(pi3k), PI3K-canon(SH2-p85)  
179 PHLPP(PDZ!1), Akt-canon(S473~p!1) → PHLPP(PDZ!1), Akt-canon(S473~u!1)  
180 GS(STXXXST~p), PP1(glysyn,ins~p) → GS(STXXXST~p!1), PP1(glysyn!1,ins~p)  
181 Akt-canon(subs!2), GSK3a(glysyn!1,a!2,S21~u), GS(STXXXST!1) →  
182 Akt-canon(subs!2), GSK3a(glysyn!1,a!2,S21~p), GS(STXXXST!1)
