# Supplementary material for: A High-Level Language for Rule-Based Modelling
Source: PubMed Central journal article supplement (PMC4456403; doi:10.1371/journal.pone.0114296), 2015-06-04
Supplement: pone.0114296.s004.pdf [file pone.0114296.s004.pdf]

Listing S4: A modular LBS- $\kappa$  insulin signalling model.

```

1 // -----
2 // New agent definitions.
3 // -----
4 agent AS160 = new{gap};
5 agent Rab10 = new{g}; // we use u/p instead of gdp/gtp.
6 agent FoxO1 = new{S256, akt, T24, S319, p1433};
7 agent FoxO3A = new{S253, akt, p1433, T32};
8 agent FoxO4 = new{T28, akt, S193, p1433};
9 agent GSK3a = new{S21, a, glysyn};
10 agent GSK3b = new{a, glysyn, S9};
11 agent PDK1 = new{akt, PH, pkc};
12 agent PHLPP = new{PDZ};
13 agent PIP = new{three};
14 agent PP2A = new{B55a};
15 agent SIN1 = new{m, akt, ric};
16 agent mLST8 = new{m};
17 agent mTOR = new{l, heat, sin, fkb12};
18 agent FKB12 = new{m, rap};
19 agent rapamycin = new{fkb12};
20 agent P1433 = new{foxo3a, foxo4, foxo1, dum};
21 agent Glut4 = new{rab, loc:kappa(gsv pm), pkc, akt};
22 agent GEF = new{gef};
23 agent CK2 = new{glysyn};
24 agent GS = new{ST, STXXXST};
25 agent PP1 = new{ins, glysyn};
26 agent Rictor = new{m2, sin, ml};
27 agent PKCz = new{pdk1, glut, T410};
28 agent IGF1 = new{igflr};
29 agent IGF1R = new{Y1131, Y1136, Y1135, alpha, NPXY, ptp};
30 agent PTP1B = new{receptor};
31 agent IR = new{alpha, Y, NPXY, ptp};
32 agent IRS1 = new{Y, PTB, PH, pi3k};
33 agent IRS2 = new{Y, PTB, PH, pi3k};
34 agent PTEN = new{subs};
35 agent PI3K = new{p110, subs, SH2p85};
36 agent Insulin = new{ir};
37 agent Akt = new{foxo3a, foxo4, foxo1, subs, as160, PH, T308, S473};
38
39 // -----
40 // Some single-rule utility modules.
41 // -----
42
43 // a module for binding two agents.
44 module bind( agent a:{m}, b:{m} ) {
45   a{m} + b{m} → a{m!1}-b{m!1}
46 };
47
48 // a module for unbinding two agents.
49 module unbind( agent a:{m}, b:{m} ) {
50   a{m!1}-b{m!1} → a{m} + b{m}
51 };
52
53 // a module for phosphorylating an agent with given binding.
54 module pho( agent a:{m} ) {
55   a{m~u!e} → a{m~p!e}
56 };
57
58 // a module for phosphorylating an agent with no binding.
59 module pho2( agent s:{m} ) {
60   pho(s{m}:{m})
61 };
62
63 // a module for dephosphorylating an agent.
64 module depho( agent a:{m} ) {
65   a{m~p!e} → a{m~u!e}
66 };
67
68 // -----
69 // Modules for multi-rule phosphorylation.
70 // -----

```

```

71 // a general module for binding, phos and unbinding, where
72 // agent components are provided for individual reactions.
73 // binding and phosphorylation is modelled here on separate
74 // sites, but can take place on the same site by instantiating
75 // both s2 actuals to the same.
76 //
77 module bpu0( agent k1:{m}, k2:{m}, k3:{m}, s1:{m1, m2}, s2:{m1, m2}, s3:{m} ) {
78   k1{m} + s1{m1~u!e, m2} → k1{m1}-s1{m1~u!e, m2!1} |
79   k2{m1}-s2{m1~u!e, m2!1} → k2{m1}-s2{m1~p!e, m2!1} |
80   k3{m1}-s3{m1} → k3{m} + s3{m}
81 };
82
83 // plain bind-phosphorylate-unbind, all on same site.
84 module bpu( agent k:{m}, s:{m} ) {
85   bpu0( k:{m}, k:{m}, k:{m}, s:{m, m}, s:{m, m}, s:{m} )
86 };
87
88 // a module to bind-phosphorylate-unbind; binding on second site of substrate.
89 // kinase is phosphorylated on binding site in first two rules.
90 module bpu2( agent k:{m}, s:{m1,m2} ) {
91   bpu0(
92     k{m~p}:{m}, k{m~p}:{m}, k:{m},
93     s{m1}:{m1,m2}, s{m1}:{m1,m2}, s:{m2}
94   )
95 };
96
97 // a module to bind-phosphorylate-unbind; binding on second site of substrate.
98 // kinase specifies an additional site in first rule only.
99 module bpu3( agent k:{m1, m2}, s:{m1,m2} ) {
100   bpu0(
101     k:{m2}, k{m1?}:{m2}, k{m1?}:{m2},
102     s{m1}:{m1,m2}, s{m1}:{m1,m2}, s:{m2}
103   )
104 };
105
106 // a module to bind-phosphorylate-phosphorylate-unbind;
107 // substrate sites m1 and m2 are modified, binding on m3.
108 // kinase is phosphorylated on first two sites in binding rule.
109 module bppu( agent k:{m1,m2,m3}, s:{m1, m2, m3} ) {
110   bind( k{m1~p, m2~p, m3}:{m3}, s{m1~u, m2~u, m3}:{m3} ) |
111   pho(k{m3!1}-s{m1~u, m3!1}:s{m1}) |
112   pho(k{m3!1}-s{m2~u, m3!1}:s{m2}) |
113   unbind( k:{m3}, s:{m3} )
114 };
115
116 // -----
117 // Modules for multi-rule dephosphorylation
118 // -----
119
120 // a general module for binding, dephos and unbinding, where
121 // agent components are provided for individual reactions.
122 // binding and phosphorylation is modelled here on separate
123 // sites, but can take place on the same site by instantiating
124 // both s2 actuals to the same.
125 module bdu0( agent p1:{m}, p2:{m}, p3:{m}, s1:{m1, m2}, s2:{m1, m2}, s3:{m} ) {
126   p1{m} + s1{m1~p!e, m2} → p1{m1}-s1{m1~p!e, m2!1} |
127   p2{m1}-s2{m1~p!e, m2!1} → p2{m1}-s2{m1~u!e, m2!1} |
128   p3{m1}-s3{m1} → p3{m} + s3{m}
129 };
130
131 // a plain module to bind-dephos-unbind, all on same site.
132 module bdu( agent ph:{m}, s:{m} ) {
133   bdu0( ph:{m}, ph:{m}, ph:{m}, s:{m, m}, s:{m, m}, s:{m} )
134 };
135
136 // a module to bind-dephos-unbind, all on same site,
137 // but with phosphatase unphos in first two rules.
138 module bdu2( agent ph:{m}, s:{m} ) {
139   bdu0( ph{m~u}:{m}, ph{m~u}:{m~u}, ph:{m}, s:{m, m}, s:{m, m}, s:{m} )
140 };
141

```

```

142 // a module to bind-dephos-unbind, with an additional site in phosphatase.
143 module bdu3( agent ph:{m1, m2}, s:{m} ) {
144   bdu0( ph{m2~p}: {m1}, ph{m2~p}: {m1}, ph: {m1}, s: {m, m}, s: {m, m}, s: {m} )
145 };
146
147 // a module to bind, dephos on four sites, and unbind.
148 // binding takes place on distinct site (last substrate site).
149 // fewer sites can be dephosphorylated by repeating actual parameters.
150 module bdddu( agent ph: {m}, s: {m1,m2,m3,m4,m0} ) {
151   ph{m} + s{m1~p, m2~p, m3~p, m4~p, m0} → ph{m!1}-s{m1~p, m2~p, m3~p, m4~p, m0!1} |
152   ph{m!1}-s{m1~p, m2~p, m3~p, m4~p, m0!1} → ph{m!1}-s{m1~u, m2~u, m3~u, m4~u, m0!1} |
153   ph{m!1}-s{m0!1} → ph{m} + s{m0}
154 };
155
156 // a module to bind, and with dephos/unbind in same rule.
157 module bd( agent ph: {m1, m2, m3}, s: {m1, m2} ) {
158   ph{m1~p, m2~p, m3} + s{m1~u, m2} → ph{m1~p, m2~p, m3!1}-s{m1~p, m2!1} |
159   ph{m3!1}-s{m1~p, m2!1} → ph{m3} + s{m1~u, m2}
160 };
161
162 // -----
163 // Modules for binding and unbinding.
164 // -----
165
166 // a bind-unbind module; site on b is phosphorylated for binding.
167 module bu( agent a: {x}, b: {y} ) {
168   a{x} + b{y~p} → a{x!1}-b{y~p!1} |
169   a{x!1}-b{y!1} → a{x} + b{y}
170 };
171
172 // a bind-unbind module with additional state on both agents.
173 module bu2( agent a: {x, y, z}, b: {x, y} ) {
174   a{x~u, y, z} + b{x~p, y~u} → a{x~u, y, z!1}-b{x~p, y~u!1} |
175   a{z!1}-b{y~u!1} → a{z!1}-b{y~p!1}
176 };
177
178 // two non-deterministic agents.
179 agent GSK3 = (GSK3b: {glysyn, a, S9} or GSK3a: {glysyn, a, S21}) :: GSK3{glysyn, a, S};
180 agent IRS = (IRS1: {PTB, Y, pi3k} or IRS2: {PTB, Y, pi3k}) :: IRS{PTB, Y, pi3k};
181
182 // -----
183 // Modules defining key components of the system.
184 // -----
185 module receptorActivation() {
186   bpu2(IGF1R: {NPXY}, IRS: {Y, PTB}) |
187   bpu2(IR: {NPXY}, IRS: {Y, PTB}) |
188   IGF1R{alpha} + IGF1{igf1r} ↔ IGF1R{alpha!1}-IGF1{igf1r!1} |
189   IR{alpha} + Insulin{ir} ↔ IR{alpha!1}-Insulin{ir!1} |
190
191   pho2(IGF1R{alpha}: {Y1131}) |
192   pho2(IGF1R{alpha}: {NPXY}) |
193   pho2(IGF1R{alpha}: {Y1136}) |
194   pho2(IGF1R{alpha}: {Y1135}) |
195   pho2(IR{alpha}: {Y}) |
196   pho2(IR{alpha}: {NPXY}) |
197
198   bdddu( PTP1B: {receptor}, IGF1R: {Y1131, Y1136, Y1135, NPXY, ptp} ) |
199   bdddu( PTP1B: {receptor}, IR: {NPXY, Y, Y, Y, ptp} )
200 };
201
202 module pipAktSignalling() {
203   module pipSignalling() {
204     bpu3( IRS{Y~p}: {Y, pi3k}, PI3K: {p110, SH2p85} ) |
205     bpu0(
206       PI3K{p110~p, subs, SH2p85}: {subs},
207       PI3K{p110~p, subs, SH2p85}: {subs},
208       PI3K{subs}: {subs},
209       PIP: {three, three},
210       PIP: {three, three},
211       PIP: {three}
212     ) |

```

```

213     bdu( PTEN:{subs}, PIP:{three} ) |
214
215     bu(PDK1:{PH}, PIP:{three}) |
216     bu(Akt:{PH}, PIP:{three})
217 };
218
219 module aktSignalling() {
220     Akt{PH!1, T308~u}-PIP{three~p!1} as a + PDK1{PH!2, akt}-PIP{three~p!2} as b → a⟨Akt{T308~e!4}⟩
221     -b⟨PDK1{akt!4}⟩ as c;
222     c → c⟨Akt{T308~p!e}⟩ |
223     Akt{T308!1}-PDK1{akt!1} → Akt{T308} + PDK1{akt} |
224
225     bind( SIN1:{akt}, Akt{S473~u, T308~p}:{S473} ) |
226     SIN1{m!4, ric!3, akt!5}-Akt{S473~u!5}-Rictor{sin!3, m2!2, m1!1}-mLST8{m!6}-mTOR{sin!4, heat!1,
227     l!6, fkb12!2} as c →{33} c⟨Akt{S473~p!e}⟩ |
228     unbind( SIN1:{akt}, Akt:{S473} ) |
229
230     bdu(PP2A:{B55a}, Akt:{T308}) |
231     bdu(PHLPP:{PDZ}, Akt:{S473})
232 };
233
234 pipSignalling() |
235 aktSignalling()
236 };
237
238 module gluconeogenesis() {
239     bppu(Akt:{T308, S473, foxo4}, FoxO4:{T28, S193, akt} ) |
240     bppu(Akt:{T308, S473, foxo3a}, FoxO3A:{T32, S253, akt} ) |
241
242     // phosphorylation of FoxO1 by Akt is similar to the above, but
243     // there is an additional site which is phosphorylated in an
244     // additional rule.
245     bind( Akt{T308~p, foxo1, S473~p}:{foxo1}, FoxO1{S256~u, S319~u, T24~u, akt}:{akt} ) |
246     pho( Akt{foxo1!1}-FoxO1{S256~u, akt!1}: FoxO1{S256} ) |
247     pho( Akt{foxo1!1}-FoxO1{S256~p, T24~u, akt!1}: FoxO1{T24} ) |
248     pho( Akt{foxo1!1}-FoxO1{S256~p, S319~u, akt!1}: FoxO1{S319} ) |
249     unbind( Akt:{foxo1}, FoxO1:{akt} ) |
250
251     bd(FoxO4:{S193, T28, p1433}, P1433:{dum, foxo4}) |
252     bd(FoxO3A:{S253, T32, p1433}, P1433:{dum, foxo3a}) |
253     // the following are similar, but also dephosphorylates kinase!
254     FoxO1{S256~p, S319~p, T24~p, p1433} + P1433{dum~u, foxo1} → FoxO1{S256~u, S319~u, T24~u, p1433!1
255     }-P1433{dum~p, foxo1!1} |
256     FoxO1{p1433!1}-P1433{dum~p, foxo1!1} → FoxO1{p1433} + P1433{dum~u, foxo1}
257 };
258
259 module glycogenSynthesis() {
260     bu2(GSK3:{S, a, glysyn}, GS:{ST, STXXXST}) |
261
262     bind( Akt{T308~p, subs, S473~p}:{subs}, GSK3{S~u, a}:{a} ) |
263     pho( Akt{subs!2}-GSK3{glysyn!1, a!2, S~u}-GS{STXXXST!1}: GSK3{S} ) |
264     unbind( Akt:{subs}, GSK3:{a} ) |
265
266     Akt{subs!2}-GSK3{glysyn!1, a!2, S~p}-GS{STXXXST~p!1} → Akt{subs!1}-GSK3{glysyn, a!1, S~p} + GS{
267     STXXXST~p} |
268
269     bdu3(PP1:{glysyn, ins}, GS:{STXXXST})
270 };
271
272 module cellGrowth() {
273     mTOR{sin} + SIN1{m} ↔ mTOR{sin!1}-SIN1{m!1} |
274     mTOR{!1} + mLST8{m} ↔ mTOR{!1!1}-mLST8{m!1} |
275
276     SIN1{ric} + Rictor{sin} ↔ SIN1{ric!4}-Rictor{sin!4} |
277     FKBI2{rap} + rapamycin{fkb12} ↔ FKBI2{rap!1}-rapamycin{fkb12!1} |
278
279     // two more bindings between mtor and rictor:
280     mTOR{sin!1, fkb12, heat}-Rictor{sin!2, m2, m1}-SIN1{ric!2, m!1} as c → c⟨mTOR{fkb12!4, heat!3}⟩⟨
281     Rictor{m2!4, m1!3}⟩ |
282     mTOR{heat!1, fkb12!2}-Rictor{m2!2, m1!1} → mTOR{heat, fkb12} + Rictor{m2, m1} |

```

```

279 bind(FKB12{m, rap!1}-rapamycin{fkb12!1}: FKB12{m}, mTOR{fkb12, 1, heat, sin}:{fkb12} ) |
280 unbind( FKB12:{m}, mTOR:{fkb12} )
281 };
282
283 module glucoseUptake() {
284   bpu3( PDK1{PH}:{PH, pkc}, PKCz:{T410, pdk1} ) |
285
286   Akt{as160, S473~p, T308~p} + AS160{gap~u!1}-Rab10{g~u!1} → Akt{as160!1, S473~p, T308~u}-AS160{
     gap~u!1} + Rab10{g~u} |
287   pho( Akt{as160!1}-AS160{gap~u!1}: AS160{gap} ) |
288   unbind( Akt:{as160}, AS160:{gap} ) |
289
290   Akt{T308~p, S473~p} + PP1{ins~u} → Akt{T308~p, S473~p} + PP1{ins~p} |
291
292   bind( PKCz{glut, T410~p}:{glut}, Glut4{loc~gsv, pkc~u}:{pkc} ) |
293   pho( PKCz{glut!1}-Glut4{pkc~u!1}: Glut4{pkc} ) |
294   unbind( PKCz:{glut}, Glut4:{pkc} ) |
295
296   bind( Rab10{g~p}:{g}, Glut4{loc~gsv, rab, akt~u}:{rab} ) |
297   pho( Rab10{g~p!1}-Glut4{rab!1, akt~u}: Glut4{akt} ) |
298   unbind( Rab10{g~p}:{g}, Glut4:{rab} ) |
299
300   bpu(CK2:{glysyn}, GS:{ST}) |
301
302   bpu(GEF:{gef}, Rab10:{g}) |
303   bdu2(AS160:{gap}, Rab10:{g}) |
304
305   Glut4{loc~gsv, akt~p, pkc~p} → Glut4{loc~pm, akt~p, pkc~u}
306 };
307
308 // -----
309 // Main body of model with module instantiations.
310 // -----
311 receptorActivation() |
312 pipAktSignalling() |
313 gluconeogenesis() |
314 glycogenSynthesis() |
315 cellGrowth() |
316 glucoseUptake()

```
